# Supplementary material
Source: publisher site journal article supplement (https://www.spandidos-publications.com/422/downloadSupplementary)

Figure S1. Cut-off points and prognostic relevance of NLR, PLR and LMR in patients with PDAC. Kaplan-Meier survival curves analyzed by cut-off points of (A) NLR, (B) PLR and (C) LMR in patients with PDAC. NLR, neutrophil to lymphocyte ratio; PLR, platelet to lymphocyte ratio; LMR, lymphocyte to monocyte ratio; PDAC, pancreatic ductal adenocarcinoma.

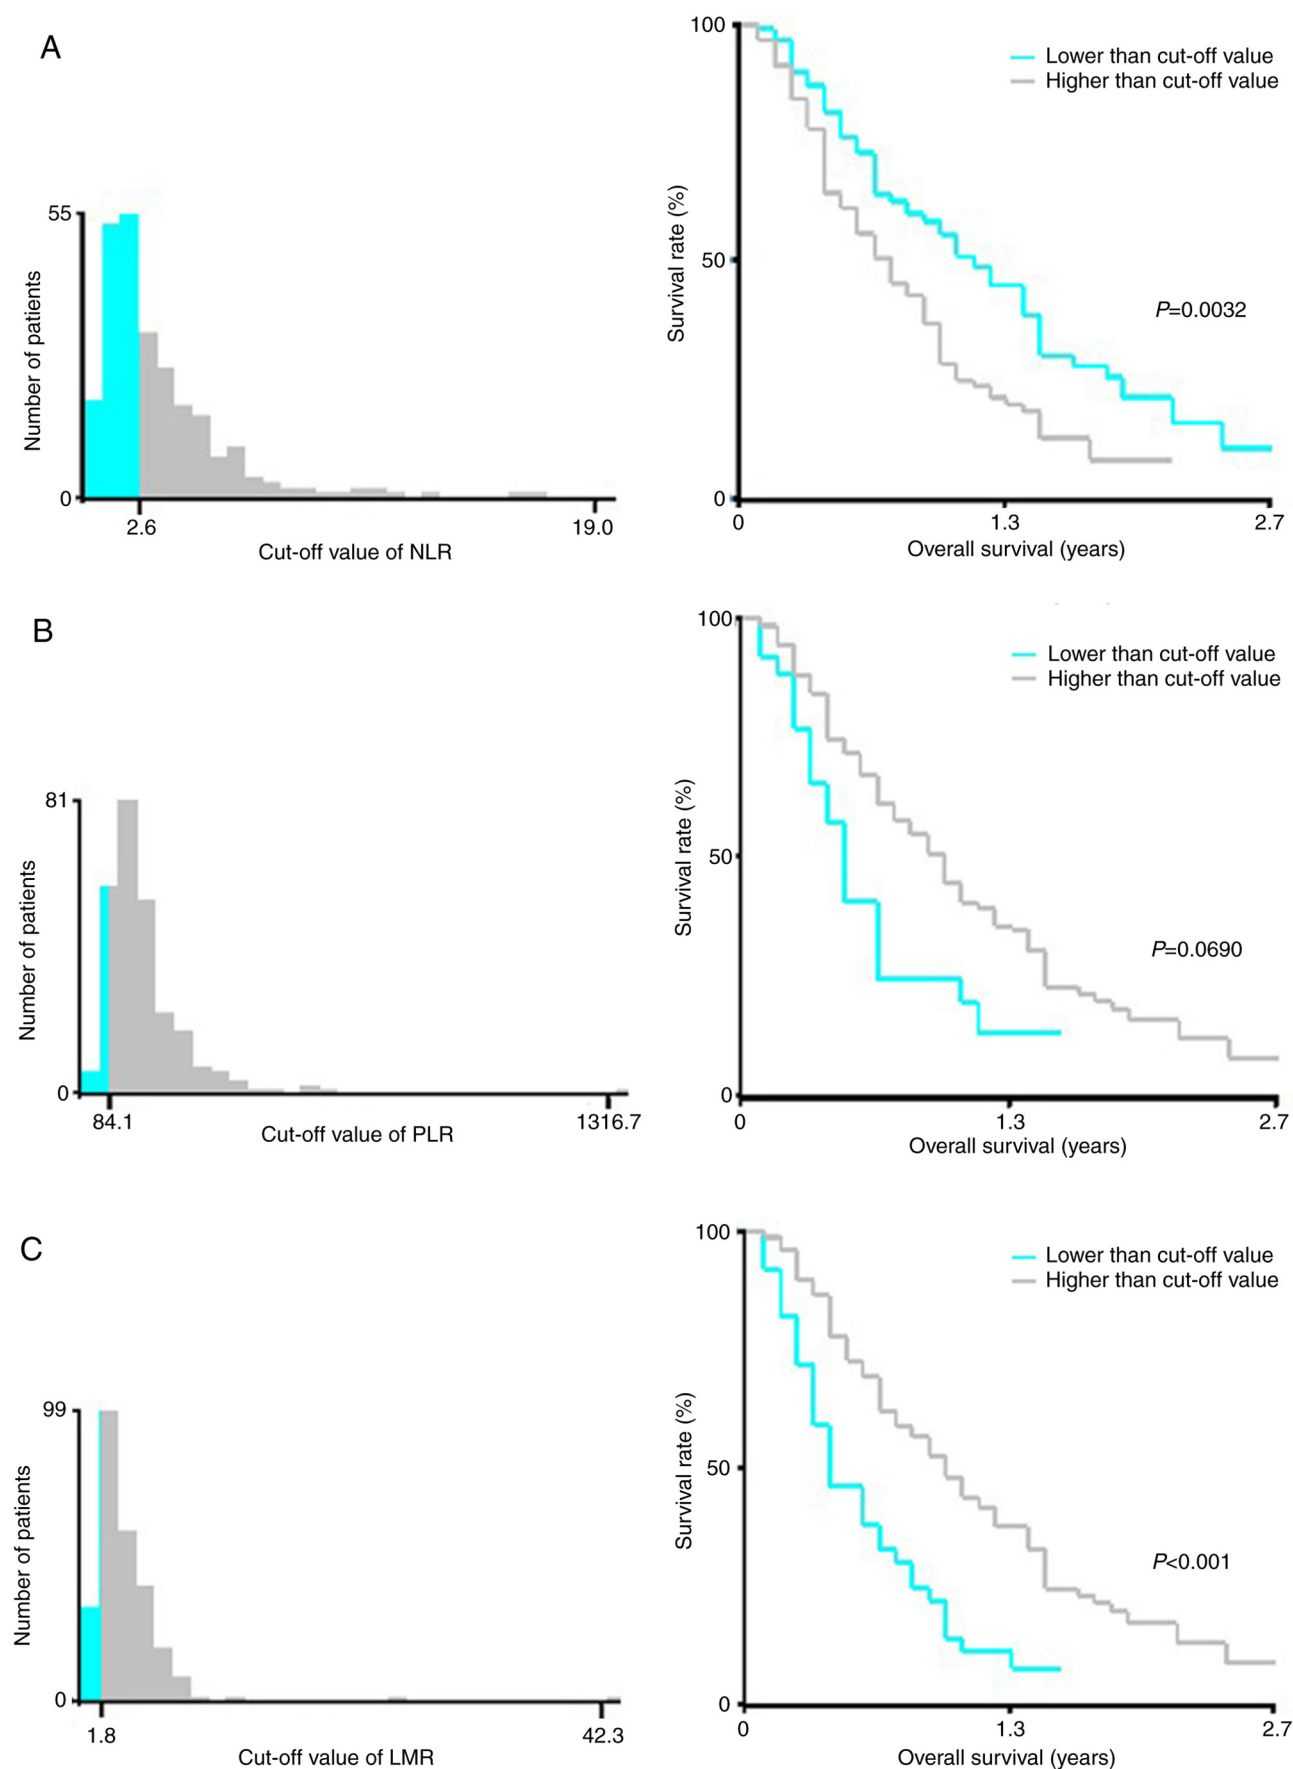

Supplement: Supplementary file 1 [file downloadSupplementary]
